# Supplementary material for: Radiotherapy dose led to a substantial prolongation of survival in patients with locally advanced rectosigmoid junction cancer: a large population based study
Source: PubMed Central journal article supplement (PMC5053735; doi:10.18632/oncotarget.8630), 2016-04-07
Supplement: oncotarget-07-28408-s001.pdf [file oncotarget-07-28408-s001.pdf]

## SUPPLEMENTARY FIGURES AND TABLE

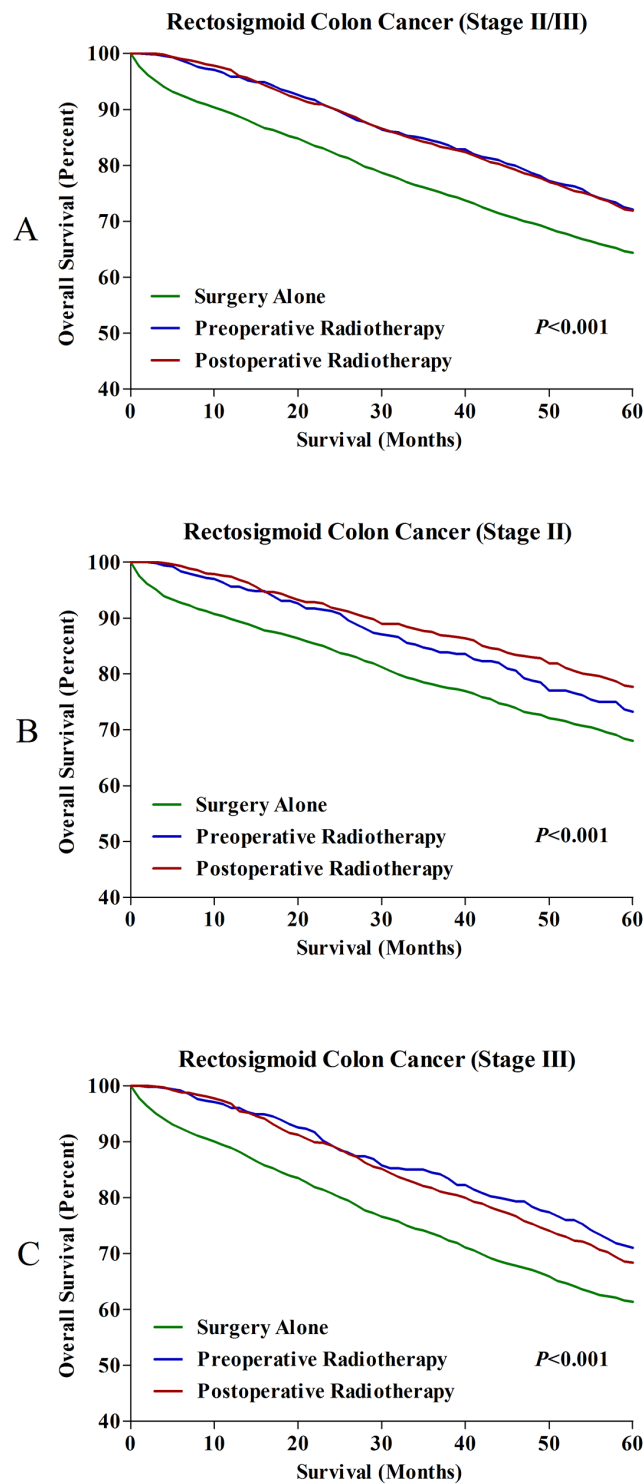

**Supplementary Figure S1:** A. 5-year OSs in all RSC patients treated with surgery alone, pre- and postoperative radiotherapy. B. 5-year OSs in stage II RSC patients treated with surgery alone, pre- and postoperative radiotherapy. C. 5-year OSs in stage III RSC patients treated with surgery alone, pre- and postoperative radiotherapy.

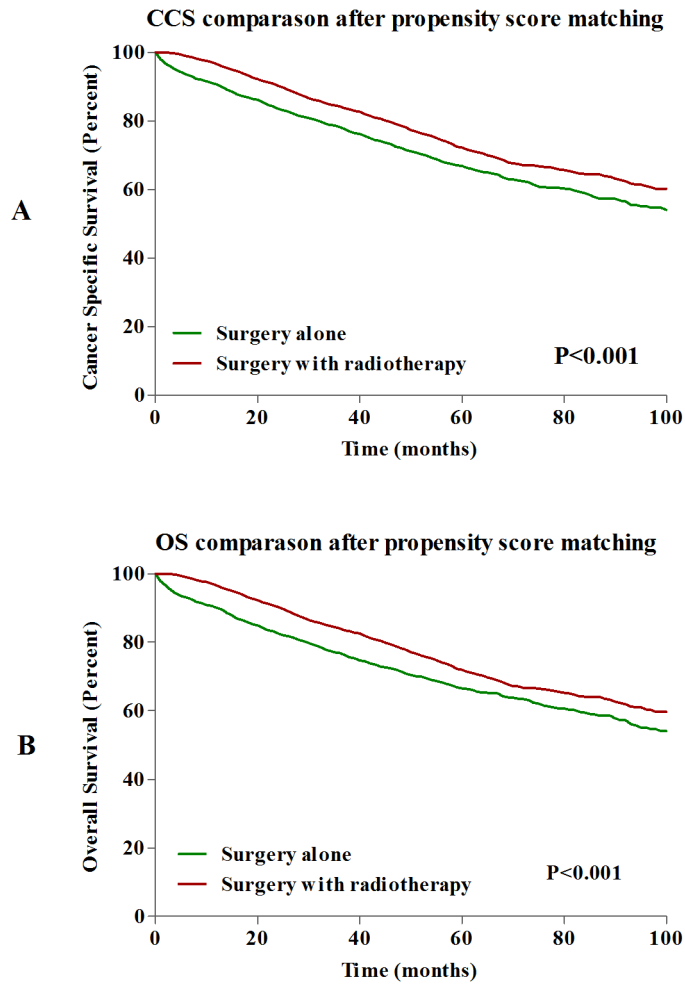

**Supplementary Figure S2:** **A.** Comparisons of 5-year CSS after propensity score matching. **B.** Comparisons of 5-year OS after propensity score matching.

Supplementary Table S1: Characteristics among patients with or without radiotherapy before and after propensity score matching

| Characteristics                  | Before matching |                           | After matching |                           |        |
|----------------------------------|-----------------|---------------------------|----------------|---------------------------|--------|
|                                  | Surgery alone   | Surgery with radiotherapy | Surgery alone  | Surgery with radiotherapy |        |
| <b>Age (Years)</b>               |                 |                           |                |                           |        |
| <60                              | 2403 (34.9)     | 1600 (50.2)               | 1130 (46.5)    | 1600 (50.2)               | <0.001 |
| ≥60                              | 4485 (65.1)     | 1586 (49.8)               | 1302 (53.5)    | 1586 (49.8)               | 0.005  |
| <b>Gender</b>                    |                 |                           |                |                           |        |
| Male                             | 3692 (53.6)     | 1932 (60.6)               | 1454 (59.8)    | 1932 (60.6)               | <0.001 |
| Female                           | 3196 (46.4)     | 1254 (39.4)               | 978 (40.2)     | 1254 (39.4)               | 0.517  |
| <b>Race</b>                      |                 |                           |                |                           |        |
| Black                            | 640 (9.3)       | 286 (9.0)                 | 211 (8.7)      | 286 (9.0)                 | 0.450  |
| White                            | 5525 (80.2)     | 2533 (79.5)               | 1944 (79.9)    | 2533 (79.5)               |        |
| Other race                       | 698 (10.1)      | 356 (11.2)                | 269 (11.1)     | 356 (11.2)                |        |
| Unknown                          | 25 (0.4)        | 11 (0.3)                  | 8 (0.3)        | 11 (0.3)                  | 0.978  |
| <b>AJCC Stage</b>                |                 |                           |                |                           |        |
| Stage II                         | 3040 (44.1)     | 1297 (40.7)               | 987 (40.6)     | 1297 (40.7)               | 0.001  |
| Stage III                        | 3848 (55.9)     | 1889 (59.3)               | 1445 (59.4)    | 1889 (59.3)               | 0.924  |
| <b>Histological type</b>         |                 |                           |                |                           |        |
| Adenocarcinoma                   | 6421 (93.2)     | 2923 (91.7)               | 2256 (92.8)    | 2923 (91.7)               | 0.025  |
| Mucinous/Signet-ring cell cancer | 443 (6.4)       | 247 (7.8)                 | 171 (7.0)      | 247 (7.8)                 |        |
| Others                           | 24 (0.3)        | 16 (0.5)                  | 5 (0.2)        | 16 (0.5)                  | 0.113  |
| <b>Grade</b>                     |                 |                           |                |                           |        |
| Grade I                          | 418 (6.1)       | 182 (5.7)                 | 148 (6.1)      | 182 (5.7)                 | <0.001 |
| Grade II                         | 5225 (75.9)     | 2317 (72.7)               | 1798 (73.9)    | 2317 (72.7)               |        |
| Grade III                        | 1009 (14.6)     | 485 (15.2)                | 379 (15.6)     | 485 (15.2)                |        |
| Grade IV                         | 103 (1.5)       | 50 (1.6)                  | 32 (1.3)       | 50 (1.6)                  |        |
| Unknown                          | 133 (1.9)       | 152 (4.8)                 | 75 (3.1)       | 152 (4.8)                 | 0.026  |
| <b>The number of lymph nodes</b> |                 |                           |                |                           |        |
| < 12                             | 1846 (26.8)     | 1027 (32.2)               | 989 (31.1)     | 1027 (32.2)               | <0.001 |
| ≥ 12                             | 4990 (72.4)     | 2131 (66.9)               | 2169 (68.0)    | 2131 (66.9)               | 0.591  |
| Unknown                          | 52 (0.8)        | 28 (0.9)                  | 28 (0.9)       | 28 (0.9)                  |        |
| <b>Tumor size (cm)</b>           |                 |                           |                |                           |        |
| < 2                              | 242 (3.5)       | 173 (5.4)                 | 127 (4.0)      | 173 (5.4)                 | <0.001 |
| 2-5                              | 3395 (49.3)     | 1307 (41.0)               | 1367 (42.9)    | 1307 (41.0)               |        |
| ≥ 5                              | 2871 (41.7)     | 1357 (42.6)               | 1351 (42.4)    | 1357 (42.6)               |        |
| Unknown                          | 380 (5.5)       | 349 (11.0)                | 341 (10.7)     | 349 (11.0)                | 0.037  |
